# Supplementary material for: The Influence of Temperature and Host Gender on Bacterial Communities in the Asian Citrus Psyllid
Source: MDPI journal article supplement (doi:10.3390/insects12121054), 2021-11-25
Supplement: s1 [file s1]

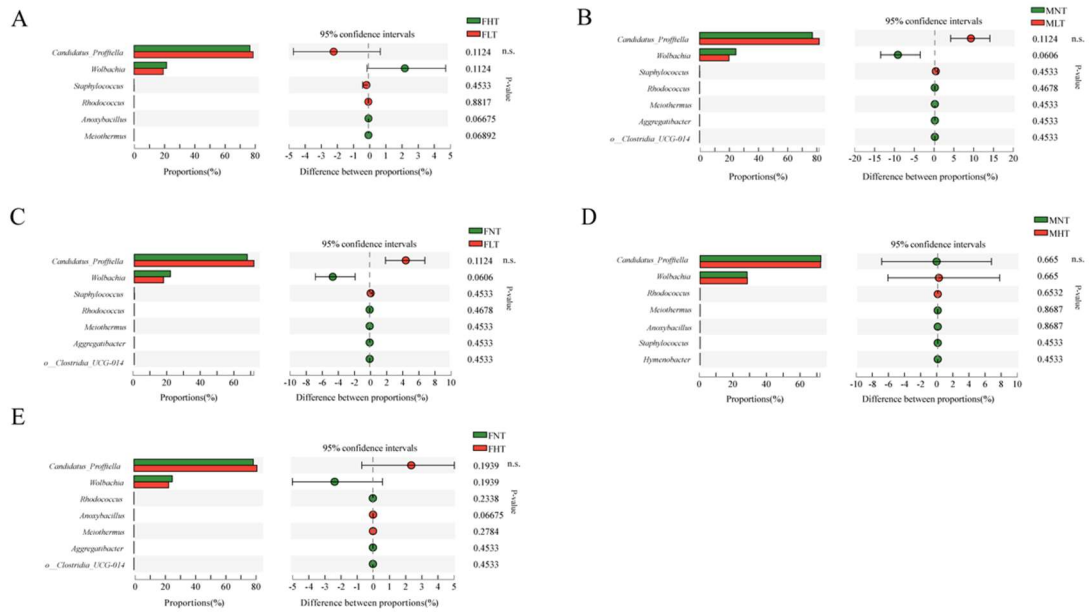

**Figure S1.** Comparison of the bacterial community dynamics with same-gender of *Diaphorina citri* in different temperature treatments. Student's t test was used to statistically determine the significant differences between males and females of *Diaphorina citri* in high-temperature, low-temperature, or normal-temperature (n.s. indicates no significance) treatments. FNT and MNT: female and male under normal temperature (26°C); FHT and MHT: female and male under high temperature (42°C); FLT and MLT: female and male under low temperature (15°C). Every group had four biological replicates of *D. citri*.

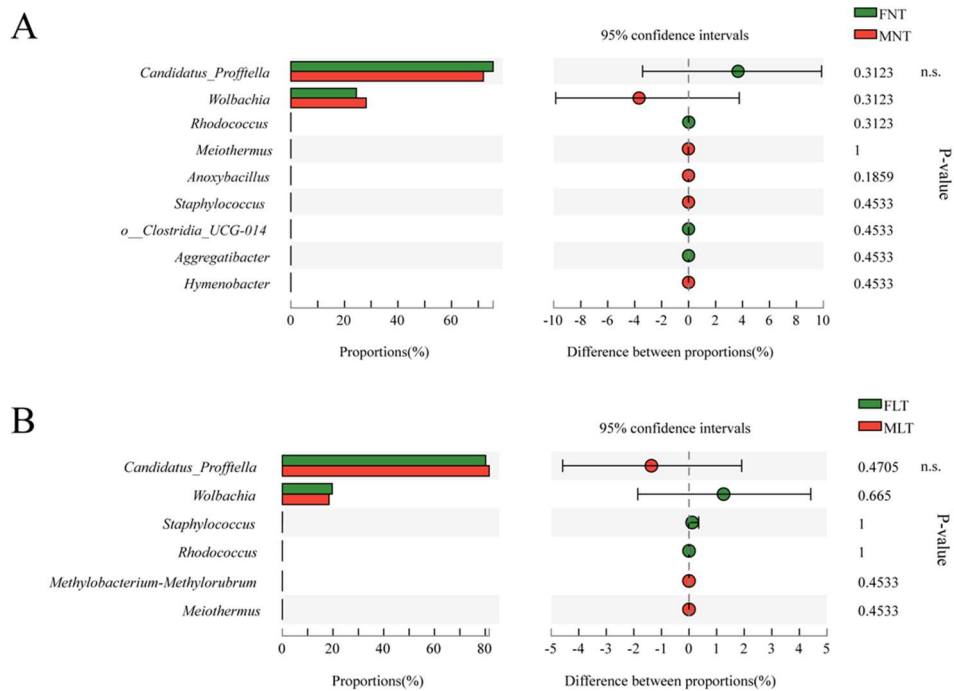

**Figure S2.** Comparison of the bacterial community dynamics of *Diaphorina citri* at the same temperature but different gender. Student's t test was used to statistically determine the significant differences between males and females of *D. citri* in low-temperature or normal-temperature (n.s. indicates no

significance) treatments. FNT and MNT: female and male under normal temperature (26°C); FLT and MLT: female and male under low temperature (15°C). Every group had four biological replicates of *D. citri*.
