# Supplementary material for: The Influence of Temperature and Host Gender on Bacterial Communities in the Asian Citrus Psyllid
Source: Insects. 2021 Nov 25;12(12):1054. doi: 10.3390/insects12121054 (PMC8704560; doi:10.3390/insects12121054)
Supplement: Supplementary file 1 [file insects-12-01054-s001.zip › insects-1449189-supplementary Tables S1-S8.xlsx]

## Sheet: Table S1
Table S1. The 16S sequences used for constructing the phylogenetic tree.
>ASV1
TGGGGAATTTTGGACAATGGGCGAAAGCCTGATCCAGCAATGCCGCGTGAGTGAAGAAGGCCTTAGGGTTGTAAAGCTCTTTTATCAGGAAAGAAACGAATTAATATAATACATTAATTTAATGACGGTACCTGAAGAATAAGCACCGGCTAACTACGTGCCAGCAGCCGCGGTAATACGTAGGGTGCGAGCGTTAATCGGAATTATTGGGCGTAAAGCGTACGTAGGCGGTTTTGTAAGACAGATGTGAAATGCCTGGGCTCAACCTTGGAATTGCATTTGTGACTGCAAAGCTAGAGTGTGTCAGAGGGAGATAGAATTCCACATGTAGCAGTGAAATGCGTAGATATGTGGAGGAATACCGATGGCGAAGGCAGTCTCCTGGGATAACACTGACGC…
>ASV2
TGGGGAATATTGGACAATGGGCGAAAGCCTGATCCAGCCATGTCGCATGAGTGAAGAAGGCCCTTGGGTTGTAAAGCTCTTTTAGTGAGGAAGATAATGACGGTACTCACAGAAGAAGTCCTGGCTAACTCCGTGCCAGCAGCCGCGGTAATACGGAGAGGGCTAGCGTTATTCGGAATTATTGGGCGTAAAGGGCGCGTAGGCTGATTAATAAGTTAAAAGTGAAATCCCGAGGCTTAACCTTGGAATTGCTTTTAAAACTATTAATCTAGAGATTGAAAGAGGATAGAGGAATTCCTGATGTAGAGGTAAAATTCGTAAATATTAGGAGGAACACCAGTGGCGAAGGCGTCTATCTGGTTCAAATCTGACGCTGAGGCGCGAAGGCGTGGGGAGCAA…
>ASV3
TGGGGAATATTGGACAATGGGCGAAAGCCTGATCCAGCTATGCCGCATGAGTGAAGAAGGCCTTTGGGTTGTAAAGCTCTTTTAGTGAGGAAGATAATGACGGTACTCACAGAAGAAGTCCTGGCTAACTCCGTGCCAGCAGCCGCGGTAATACGGAGAGGGCTAGCGTTATTCGGAATTATTGGGCGTAAAGGGCGCGTAGGCTGATTAATAAGTTAAAAGTGAAATCCCGAGGCTTAACCTTGGAATTGCTTTTAAAACTATTAATCTAGAGATTGAAAGAGGATAGAGGAATTCCTGATGTAGAGGTAAAATTCGTAAATATTAGGAGGAACACCAGTGGCGAAGGCGTCTATCTGGTTCAAATCTGACGCTGAGGCGCGAAGGCGTGGGGAGCAA…
>ASV4
TGGGGAATTTTGGACAATGGGCGAAAGCCTGATCCAGCAATGCCGCGTGAGTGAAGAAGGCCTTAGGGTTGTAAAGCTCTTTTATCAGGAAAGAAACGAATTAATATAATACATTAATTTAATGACGGTACCTGAAGAATAAGCACCGGCTAACTACGTGCCAGCAGCCGCGGTAATACGTAGGGTGCGAGCGTTAATCGGAATCATTGGGCGTAAAGCGTACGTAGGCGGTTTTGTAAGACAGATGTGAAATGCCTGGGCTCAACCTTGGAATTGCATTTGTGACTGCAAAGCTAGAGTGTGTCAGAGGGAGATAGAATTCCACATGTAGCAGTGAAATGCGTAGATATGTGGAGGAATACCGATGGCGAAGGCAGTCTCCTGGGATAACACTGACGC…
>ASV5
TGGGGAATATTGCACAATGGGCGAAAGCCTGATGCAGCGACGCCGCGTGAGGGATGACGGCCTTCGGGTTGTAAACCTCTTTCAGCAGGGACGAAGCGCAAGTGACGGTACCTGCAGAAGAAGCACCGGCTAACTACGTGCCAGCAGCCGCGGTAATACGTAGGGTGCAAGCGTTGTCCGGAATTACTGGGCGTAAAGAGTTCGTAGGCGGTTTGTCGCGTCGTTTGTGAAAACCAGCAGCTCAACTGCTGGCTTGCAGGCGATACGGGCAGACTTGAGTACTGCAGGGGAGACTGGAATTCCTGGTGTAGCGGTGAAATGCGCAGATATCAGGAGGAACACCGGTGGCGAAGGCGGGTCTCTGGGCAGTAACTGACGCTGAGGAACGAAAGCGTGGGT…
>ASV6
TAGGGAATCTTCCGCAATGGACGAAAGTCTGACGGAGCAACGCCGCGTGAGCGAAGAAGGCCTTCGGGTCGTAAAGCTCTGTTGTTAGGGAAGAACAAGTAACGCAGTAACTGGCGTTACCGTGACGGTACCTAACGAGAAAGCCACGGCTAACTACGTGCCAGCAGCCGCGGTAATACGTAGGTGGCAAGCGTTGTCCGGAATTATTGGGCGTAAAGCGCGCGCAGGCGGTTCCTTAAGTCTGATGTGAAAGCCCACGGCTCAACCGTGGAGGGTCATTGGAAACTGGGGGACTTGAGTGCAGAAGAGGAGAGCGGAATTCCACGTGTAGCGGTGAAATGCGTAGAGATGTGGAGGAACACCAGTGGCGAAGGCGGCTCTCTGGTCTGTAACTGACGC…
>ASV7
TGGGGAATTTTGGACAATGGGCGCAAGCCTGATCCAGCAATGCCGCGTGAGTGAAGAAGGCCTTAGGGTTGTAAAGCTCTTTTATCAGGAAAGAAACGAATTAATATAATACATTAATTTAATGACGGTACCTGAAGAATAAGCACCGGCTAACTACGTGCCAGCAGCCGCGGTAATACGTAGGGTGCGAGCGTTAATCGGAATTATTGGGCGTAAAGCGTACGTAGGCGGTTTTGTAAGACAGATGTGAAATGCCTGGGCTCAACCTTGGAATTGCATTTGTGACTGCAAAGCTAGAGTGTGTCAGAGGGAGATAGAATTCCACATGTAGCAGTGAAATGCGTAGATATGTGGAGGAATACCGATGGCGAAGGCAGTCTCCTGGGATAACACTGACGC…
>ASV8
TGGGGAATTTTGGACAATGGGCGAAAGCCTGATCCAGCAATGCCGCGTGAGTGAAGAAGGCCTTAGGGTTGTCAAGCTCTTTTATCAGGAAAGAAACGAATTAATATAATACATTAATTTAATGACGGTACCTGAAGAATAAGCACCGGCTAACTACGTGCCAGCAGCCGCGGTAATACGTAGGGTGCGAGCGTTAATCGGAATTATTGGGCGTAAAGCGTACGTAGGCGGTTTTGTAAGACAGATGTGAAATGCCTGGGCTCAACCTTGGAATTGCATTTGTGACTGCAAAGCTAGAGTGTGTCAGAGGGAGATAGAATTCCACATGTAGCAGTGAAATGCGTAGATATGTGGAGGAATACCGATGGCGAAGGCAGTCTCCTGGGATAACACTGACGC…
>ASV9
TGGGGAATATTGGACAATGGGCGCAAGCCTGATCCAGCCATGTCGCATGAGTGAAGAAGGCCCTTGGGTTGTAAAGCTCTTTTAGTGAGGAAGATAATGACGGTACTCACAGAAGAAGTCCTGGCTAACTCCGTGCCAGCAGCCGCGGTAATACGGAGAGGGCTAGCGTTATTCGGAATTATTGGGCGTAAAGGGCGCGTAGGCTGATTAATAAGTTAAAAGTGAAATCCCGAGGCTTAACCTTGGAATTGCTTTTAAAACTATTAATCTAGAGATTGAAAGAGGATAGAGGAATTCCTGATGTAGAGGTAAAATTCGTAAATATTAGGAGGAACACCAGTGGCGAAGGCGTCTATCTGGTTCAAATCTGACGCTGAGGCGCGAAGGCGTGGGGAGCAA…
>ASV10
TGGGGAATATTGGACAATGGGCGAAAGCCTGATCCAGCCATGTCGCATGAGTGAAGAAGGCCCTTGGGTTGTCAAGCTCTTTTAGTGAGGAAGATAATGACGGTACTCACAGAAGAAGTCCTGGCTAACTCCGTGCCAGCAGCCGCGGTAATACGGAGAGGGCTAGCGTTATTCGGAATTATTGGGCGTAAAGGGCGCGTAGGCTGATTAATAAGTTAAAAGTGAAATCCCGAGGCTTAACCTTGGAATTGCTTTTAAAACTATTAATCTAGAGATTGAAAGAGGATAGAGGAATTCCTGATGTAGAGGTAAAATTCGTAAATATTAGGAGGAACACCAGTGGCGAAGGCGTCTATCTGGTTCAAATCTGACGCTGAGGCGCGAAGGCGTGGGGAGCAA…
>ASV11
TTAGGAATCTTCGTCAATGGGCGCAAGCCTGAACGAGCGACGCCGCTTGAGGGACGAAGCCCTTCGGGGTGTAAACCTCTGAACAGGGGACGATGATGACGGTACCCTGCTAATAGCACCGGCTAACTCCGTGCCAGCAGCCGCGGTAATACGGAGGGTGCGAGCGTTACCCGGATTTACTGGGCGTAAAGGGCGTGTAGGCGGTTTTCTAAGTCCGGGGCTAAAGACCAGGGCTCAACCCTGGGTATGCCTTGGATACTGGAAGGCTGGACGGCTGGAGGGGGCAGCGGAATTTCCGGAGTAGCGGTGAAATGCGCAGATACCGGAAGGAACGCCAATAGCGAAGGCAGCTGCCTGGACAGTACGTGACGCTGAGGCGCGAAAGCGTGGGGAGCAAAC…
>ASV12
TAGGGAATCTTCCGCAATGGACGAAAGTCTGACGGAGCAACGCCGCGTGAGCGAAGAAGGCCTTCGGGTCGTAAAGCTCTGTTGTTAGGGAAGAACAAGTAACGCAGTAACTGGCGTTACCGTGACGGTACCTAACGAGAAAGCCACGGCTAACTACGTGCCAGCAGCCGCGGTAATACGTAGGTGGCAAGCGTTGTCCGGAATTATTGGGCGTAAAGCGCGCGCAGGCGGTTCCTTAAGTCTGATGTGAAAGCCCACGGCTCAACCGTGGAGGGTCATTGGAAACTGGGGGACTTGAGTGCAGAAGAGGAGAGTGGAATTCCACGTGTAGCGGTGAAATGCGTAGAGATGTGGAGGAACACCAGTGGCGAAGGCGGCTCTCTGGTCTGTAACTGACGC…
>ASV13
TGGGGAATTTTGGACAATGGGCGAACGCCTGATCCAGCAATGCCGCGTGAGTGAAGAAGGCCTTAGGGTTGTAAAGCTCTTTTATCAGGAAAGAAACGAATTAATATAATACATTAATTTAATGACGGTACCTGAAGAATAAGCACCGGCTAACTACGTGCCAGCAGCCGCGGTAATACGTAGGGTGCGAGCGTTAATCGGAATTATTGGGCGTAAAGCGTACGTAGGCGGTTTTGTAAGACAGATGTGAAATGCCTGGGCTCAACCTTGGAATTGCATTTGTGACTGCAAAGCTAGAGTGTGTCAGAGGGAGATAGAATTCCACATGTAGCAGTGAAATGCGTAGATATGTGGAGGAATACCGATGGCGAAGGCAGTCTCCTGGGATAACACTGACGC…
>ASV14
TGGGGAATTTTGGACAATGGGCGAAAGCCTGATCCAGCAATGCCGCGTGAGTGAAGAAGGCCTTAGGGTTGTAACGCTCTTTTATCAGGAAAGAAACGAATTAATATAATACATTAATTTAATGACGGTACCTGAAGAATAAGCACCGGCTAACTACGTGCCAGCAGCCGCGGTAATACGTAGGGTGCGAGCGTTAATCGGAATTATTGGGCGTAAAGCGTACGTAGGCGGTTTTGTAAGACAGATGTGAAATGCCTGGGCTCAACCTTGGAATTGCATTTGTGACTGCAAAGCTAGAGTGTGTCAGAGGGAGATAGAATTCCACATGTAGCAGTGAAATGCGTAGATATGTGGAGGAATACCGATGGCGAAGGCAGTCTCCTGGGATAACACTGACGC…
>ASV15
TGGGGAATATTGGACAATGGGCGAACGCCTGATCCAGCCATGTCGCATGAGTGAAGAAGGCCCTTGGGTTGTAAAGCTCTTTTAGTGAGGAAGATAATGACGGTACTCACAGAAGAAGTCCTGGCTAACTCCGTGCCAGCAGCCGCGGTAATACGGAGAGGGCTAGCGTTATTCGGAATTATTGGGCGTAAAGGGCGCGTAGGCTGATTAATAAGTTAAAAGTGAAATCCCGAGGCTTAACCTTGGAATTGCTTTTAAAACTATTAATCTAGAGATTGAAAGAGGATAGAGGAATTCCTGATGTAGAGGTAAAATTCGTAAATATTAGGAGGAACACCAGTGGCGAAGGCGTCTATCTGGTTCAAATCTGACGCTGAGGCGCGAAGGCGTGGGGAGCAA…
>ASV16
TGGGGAATATTGGACAATGGGCGAAAGCCTGATCCAGCCATGTCGCATGAGTGAAGAAGGCCCTTGGGTTGTAACGCTCTTTTAGTGAGGAAGATAATGACGGTACTCACAGAAGAAGTCCTGGCTAACTCCGTGCCAGCAGCCGCGGTAATACGGAGAGGGCTAGCGTTATTCGGAATTATTGGGCGTAAAGGGCGCGTAGGCTGATTAATAAGTTAAAAGTGAAATCCCGAGGCTTAACCTTGGAATTGCTTTTAAAACTATTAATCTAGAGATTGAAAGAGGATAGAGGAATTCCTGATGTAGAGGTAAAATTCGTAAATATTAGGAGGAACACCAGTGGCGAAGGCGTCTATCTGGTTCAAATCTGACGCTGAGGCGCGAAGGCGTGGGGAGCAA…
>ASV17
TGGGGAATTTTGGACAATGGGCGACAGCCTGATCCAGCAATGCCGCGTGAGTGAAGAAGGCCTTAGGGTTGTAAAGCTCTTTTATCAGGAAAGAAACGAATTAATATAATACATTAATTTAATGACGGTACCTGAAGAATAAGCACCGGCTAACTACGTGCCAGCAGCCGCGGTAATACGTAGGGTGCGAGCGTTAATCGGAATTATTGGGCGTAAAGCGTACGTAGGCGGTTTTGTAAGACAGATGTGAAATGCCTGGGCTCAACCTTGGAATTGCATTTGTGACTGCAAAGCTAGAGTGTGTCAGAGGGAGATAGAATTCCACATGTAGCAGTGAAATGCGTAGATATGTGGAGGAATACCGATGGCGAAGGCAGTCTCCTGGGATAACACTGACGC…
>ASV18
TGGGGAATTTTGGACAATGGGCGAAAGCCTGATCCAGCAATGCCGCGTGAGTGAAGAAGGCCTTAGGGTTGTACAGCTCTTTTATCAGGAAAGAAACGAATTAATATAATACATTAATTTAATGACGGTACCTGAAGAATAAGCACCGGCTAACTACGTGCCAGCAGCCGCGGTAATACGTAGGGTGCGAGCGTTAATCGGAATTATTGGGCGTAAAGCGTACGTAGGCGGTTTTGTAAGACAGATGTGAAATGCCTGGGCTCAACCTTGGAATTGCATTTGTGACTGCAAAGCTAGAGTGTGTCAGAGGGAGATAGAATTCCACATGTAGCAGTGAAATGCGTAGATATGTGGAGGAATACCGATGGCGAAGGCAGTCTCCTGGGATAACACTGACGC…
>ASV19
TGGGGAATATTGGACAATGGGCGACAGCCTGATCCAGCCATGTCGCATGAGTGAAGAAGGCCCTTGGGTTGTAAAGCTCTTTTAGTGAGGAAGATAATGACGGTACTCACAGAAGAAGTCCTGGCTAACTCCGTGCCAGCAGCCGCGGTAATACGGAGAGGGCTAGCGTTATTCGGAATTATTGGGCGTAAAGGGCGCGTAGGCTGATTAATAAGTTAAAAGTGAAATCCCGAGGCTTAACCTTGGAATTGCTTTTAAAACTATTAATCTAGAGATTGAAAGAGGATAGAGGAATTCCTGATGTAGAGGTAAAATTCGTAAATATTAGGAGGAACACCAGTGGCGAAGGCGTCTATCTGGTTCAAATCTGACGCTGAGGCGCGAAGGCGTGGGGAGCAA…
>ASV20
TGGGGAATATTGGACAATGGGCGAAAGCCTGATCCAGCCATGTCGCATGAGTGAAGAAGGCCCTTGGGTTGTACAGCTCTTTTAGTGAGGAAGATAATGACGGTACTCACAGAAGAAGTCCTGGCTAACTCCGTGCCAGCAGCCGCGGTAATACGGAGAGGGCTAGCGTTATTCGGAATTATTGGGCGTAAAGGGCGCGTAGGCTGATTAATAAGTTAAAAGTGAAATCCCGAGGCTTAACCTTGGAATTGCTTTTAAAACTATTAATCTAGAGATTGAAAGAGGATAGAGGAATTCCTGATGTAGAGGTAAAATTCGTAAATATTAGGAGGAACACCAGTGGCGAAGGCGTCTATCTGGTTCAAATCTGACGCTGAGGCGCGAAGGCGTGGGGAGCAA…
>ASV21
TAGGGAATCTTCCGCAATGGGCGAAAGCCTGACGGAGCAACGCCGCGTGAGTGATGAAGGGTTTCGGCTCGTAAAACTCTGTTATTAGGGAAGAACAAATGTGTAAGTAACTGTGCACATCTTGACGGTACCTAATCAGAAAGCCACGGCTAACTACGTGCCAGCAGCCGCGGTAATACGTAGGTGGCAAGCGTTATCCGGAATTATTGGGCGTAAAGCGCGCGTAGGCGGTTTCTTAAGTCTGATGTGAAAGCCCACGGCTCAACCGTGGAGGGTCATTGGAAACTGGGAAACTTGAGTGCAGAAGAGGAAAGTGGAATTCCATGTGTAGCGGTGAAATGCGCAGAGATATGGAGGAACACCAGTGGCGAAGGCGACTTTCTGGTCTGTAACTGACGC…
>ASV22
TGGGGAATTTTGGACAATGGGAGAAAGCCTGATCCAGCAATGCCGCGTGAGTGAAGAAGGCCTTAGGGTTGTAAAGCTCTTTTATCAGGAAAGAAACGAATTAATATAATACATTAATTTAATGACGGTACCTGAAGAATAAGCACCGGCTAACTACGTGCCAGCAGCCGCGGTAATACGTAGGGTGCGAGCGTTAATCGGAATTATTGGGCGTAAAGCGTACGTAGGCGGTTTTGTAAGACAGATGTGAAATGCCTGGGCTCAACCTTGGAATTGCATTTGTGACTGCAAAGCTAGAGTGTGTCAGAGGGAGATAGAATTCCACATGTAGCAGTGAAATGCGTAGATATGTGGAGGAATACCGATGGCGAAGGCAGTCTCCTGGGATAACACTGACGC…
>ASV23
TGGGGAATATTGGACAATGGGCGCAAGCCTGATCCAGCCATGCCGCGTGAGTGATGAAGGCCTTAGGGTTGTAAAGCTCTTTTATCCGGGACGATAATGACGGTACCGGAGGAATAAGCCCCGGCTAACTTCGTGCCAGCAGCCGCGGTAATACGAAGGGGGCTAGCGTTGCTCGGAATCACTGGGCGTAAAGGGCGCGTAGGCGGCGTTTTAAGTCGGGGGTGAAAGCCTGTGGCTCAACCACAGAATGGCCTTCGATACTGGGACGCTTGAGTATGGTAGAGGTTGGTGGAACTGCGAGTGTAGAGGTGAAATTCGTAGATATTCGCAAGAACACCGGTGGCGAAGGCGGCCAACTGGACCATTACTGACGCTGAGGCGCGAAAGCGTGGGGAGCAA…
>ASV24
TAGGGAATATTGGGCAATGGGCGAGAGCCTGACCCAGCCATGCCGCGTGCAGGAAGAAGGCTTTCTGAGTCGTAAACTGCTTTTGACAGGGAAGAATAAGCATGACGTGTCATGCGATGACGGTACCTGCAGAATAAGCACCGGCTAACTCCGTGCCAGCAGCCGCGGTAATACGGAGGGTGCGAGCGTTGTCCGGATTTATTGGGTTTAAAGGGTGCGTAGGCGGCCGTTTAAGTCTGGGGTGAAAGCCCGCTGCTCAACAGCGGAACTGCCCTGGATACTGGATGGCTTGAGTACAGACGAGGTTGGCGGAATGGACGGAGTAGCGGTGAAATGCATAGATACCGTCCAGAACCCCGATTGCGAAGGCAGCTGACTAGGCTGTTACTGACGCTGAGG…
>ASV25
TCGGGAATATTGCGCAATGGAGGAAACTCTGACGCAGTGACGCCGCGTATAGGAAGAAGGTTTTCGGATTGTAAACTATTGTCGTTAGGGAAGATAAAAGACTGTACCTAAGGAGGAAGCCCCGGCTAACTATGTGCCAGCAGCCGCGGTAATACATAGGGGGCAAGCGTTATCCGGAATTATTGGGTGTAAAGGGTGCGTAGACGGAGAAACAAGTTGGTTGTGAAATCCCTCGGCTCAACTGAGGAACTGCAACCAAAACTATTTCCCTTGAGTGTCGGAGAGGAAAGTGGAATTCCTAGTGTAGCGGTGAAATGCGTAGATATTAGGAGGAACACCAGTGGCGAAGGCGACTTTCTGGACGATAACTGACGTTGAGGCACGAAAGTGTGGGGAGCA…
>ASV26
TAGGGAATCTTCCGCAATGGACGAAAGTCTGACGGAGCAACGCCGCGTGAGCGAAGAAGGCCTTCGGGTCGTAAAGCTCTGTTGTTAGGGAAGAACAAGTAACGCAGTAACTGGCATTACCGTGACGGTACCTAACGAGAAAGCCACGGCTAACTACGTGCCAGCAGCCGCGGTAATACGTAGGTGGCAAGCGTTGTCCGGAATTATTGGGCGTAAAGCGCGCGCAGGCGGTTCCTTAAGTCTGATGTGAAAGCCCACGGCTCAACCGTGGAGGGTCATTGGAAACTGGGGGACTTGAGTGCAGAAGAGGAGAGCGGAATTCCACGTGTAGCGGTGAAATGCGTAGAGATGTGGAGGAACACCAGTGGCGAAGGCGGCTCTCTGGTCTGTAACTGACGC…
>ASV27
TGGGGAATATTGCGCAATGGGGGCAACCCTGACGCAGCCATGCCGCGTGAATGAAGAAGGCCTTCGGGTTGTAAAGTTCTTTCGGTGACGAGGAAGGCGTGATGTTTAATAGGCATCACGATTGACGTTAATCACAGAAGAAGCACCGGCTAACTCCGTGCCAGCAGCCGCGGTAATACGGAGGGTGCGAGCGTTAATCGGAATAACTGGGCGTAAAGGGCACGCAGGCGGCTATTTAAGTGAGGTGTGAAATCCCCGGGCTTAACCTGGGAATTGCATTTCAGACTGGGTAGCTAGAGTACTTTAGGGAGGGGTAGAATTCCACGTGTAGCGGTGAAATGCGTAGAGATGTGGAGGAATACCGAAGGCGAAGGCAGCCCCTTGGGAATGTACTGACGC…

## Sheet: Table S2
Table S2. Primer sequences used for quantitative real-time PCR.
Primers names	Sequence (5' to 3')
Profftella-F	TAATACGTAGGGTGCGAGCG
Profftella-R	CTCCCCACGCTTTCGTACAT
Wolbachia-F	TGGTACAATAAGTGATGAAGAAAC
Wolbachia-R	AAAAATTAAACGCTACTCCA
Actin-F	CCCTGGACTTTGAACAGGAA
Actin-R	CTCGTGGATACCGCAAGATT
GAPDH-F	CATGGCAAGTTCAACGGTGA
GAPDH-R	CGATGCCTTCTCAATGGTGG

## Sheet: Table S3
Table S3. Overview of 16S rRNA gene fragment sequencing dataset obtained with Diaphorina citri.
Sample	Reads	Bases	Average length (bp)	Min length (bp)	Max length (bp)
FHT1	61863	26223607	423.898	399	478
FHT2	62029	26267309	423.468	396	489
FHT3	65026	27499856	422.906	401	476
FHT4	50472	21360884	423.222	400	431
FLT1	59325	25128510	423.574	401	432
FLT2	55739	23632251	423.981	317	430
FLT3	62618	26503657	423.259	401	431
FLT4	52847	22427650	424.388	400	431
FNT1	63057	26711800	423.614	345	432
FNT2	69625	29406242	422.352	402	430
FNT3	63792	26952839	422.511	398	505
FNT4	61030	25782240	422.452	401	478
MHT1	62474	26373365	422.149	401	430
MHT2	57863	24414762	421.941	400	434
MHT3	63186	26698928	422.545	400	430
MHT4	55650	23404462	420.565	401	433
MLT1	52454	22276922	424.694	345	431
MLT2	54461	23059552	423.414	400	478
MLT3	62074	26387128	425.091	401	430
MLT4	58088	24607192	423.619	317	430
MNT1	64922	27550385	424.361	345	505
MNT2	47879	20175800	421.391	400	431
MNT3	62682	26323566	419.954	304	431
MNT4	53274	22471754	421.815	402	477

## Sheet: Table S4
Table S4. Bacterial community composition (%) in Diaphorina citri at different taxonomic levels under different temperatures (only taxa with a relative abundance > 0.1% are shown).
Phylum	Proportion (%)	Class	Proportion (%)	Order	Proportion (%)	Family	Proportion (%)	Genus	Proportion (%)
Proteobacteria	0.9993	Gammaproteobacteria	72.68	Burkholderiales	72.68	Oxalobacteraceae	72.68	Candidatus Profftella	72.68
		Alphaproteobacteria	27.25	Rickettsiales	27.25	Anaplasmataceae	27.25	Wolbachia	27.25

## Sheet: Table S5
Table S5. Bacterial community composition in different samples of Diaphorina citri. Total counts are provided for different sample types at the specified taxonomic resolutions.
Samples	Phylum	Class	Order	Family	Genus	Species	ASV
MNT1	2	3	3	3	3	3	5
MNT2	2	3	3	3	3	3	3
MNT3	4	5	6	5	6	6	6
MNT4	3	4	4	4	4	5	6
FNT1	2	3	3	3	3	3	6
FNT2	3	4	4	4	3	4	8
FNT3	2	3	4	4	4	3	6
FNT4	3	3	4	4	3	3	5
Total NT	5	7	9	9	9	10	24
MLT1	3	3	3	4	8	8	7
MLT2	2	4	4	4	7	7	7
MLT3	2	4	3	2	4	4	3
MLT4	2	3	3	2	8	8	8
FLT1	2	4	3	3	3	7	8
FLT2	1	2	2	2	2	3	5
FLT3	2	2	2	3	3	4	4
FLT4	2	3	3	3	3	4	4
Total LT	4	5	6	6	6	7	18
MHT1	2	3	3	3	3	3	7
MHT2	3	4	4	4	4	5	5
MHT3	2	3	3	3	3	5	8
MHT4	2	3	3	3	3	5	4
FHT1	2	3	3	4	4	5	5
FHT2	2	3	3	4	4	4	7
FHT3	3	4	4	4	4	4	9
FHT4	3	4	4	4	4	5	5
Total HT	4	5	5	5	5	6	16
Total (LT&NT&HT)	5	7	10	10	10	11	27

## Sheet: Table S6
Table S6. The bacterial community of Diaphorina citri at the different taxonomic level and their abundance in different temperature treatments.
Domain	Kingdom	Phylum	Class	Order	Family	Genus	Species	ASV	MNT4	MNT3	MNT2	MNT1	FHT1	FNT4	FNT1	FNT2	FNT3	FLT3	FLT4	FLT1	MHT4	MLT2	MLT4	MLT3	MLT1	MHT2	MHT1	FHT4	MHT3	FHT2	FHT3	FLT2
Bacteria	norank	Proteobacteria	Alphaproteobacteria	Rickettsiales	Anaplasmataceae	Wolbachia	proteobacterium_symbiont_of_Nilaparvata_lugens_Wolbachia	ASV9	0	0	0	0	0	0	30	0	0	0	0	37	0	0	38	0	0	0	0	0	0	0	0	0
Bacteria	norank	Proteobacteria	Gammaproteobacteria	Burkholderiales	Oxalobacteraceae	Candidatus_Profftella	Candidatus_Profftella_armatura	ASV8	0	0	0	0	0	0	87	0	0	0	0	94	0	0	87	0	0	0	0	0	0	0	0	0
Bacteria	norank	Proteobacteria	Gammaproteobacteria	Burkholderiales	Oxalobacteraceae	Candidatus_Profftella	Candidatus_Profftella_armatura	ASV7	0	0	0	0	0	0	114	0	0	0	0	131	0	0	122	0	0	0	0	0	0	0	0	0
Bacteria	norank	Firmicutes	Bacilli	Bacillales	Bacillaceae	Anoxybacillus	unclassified_Anoxybacillus	ASV6	2	0	0	0	5	0	0	0	0	0	0	0	0	0	0	0	0	4	0	2	0	0	0	0
Bacteria	norank	Actinobacteriota	Actinobacteria	Corynebacteriales	Nocardiaceae	Rhodococcus	unclassified_Rhodococcus	ASV5	4	2	3	0	0	2	3	5	7	6	4	0	3	0	4	1	2	0	4	2	4	3	3	0
Bacteria	norank	Proteobacteria	Gammaproteobacteria	Burkholderiales	Oxalobacteraceae	Candidatus_Profftella	Candidatus_Profftella_armatura	ASV4	264	0	0	564	0	81	0	0	0	0	0	0	0	0	0	0	0	0	0	0	0	0	0	0
Bacteria	norank	Proteobacteria	Alphaproteobacteria	Rickettsiales	Anaplasmataceae	Wolbachia	unclassified_Wolbachia	ASV3	727	723	595	389	590	757	458	621	516	524	392	394	687	403	477	336	302	611	691	754	662	748	763	289
Bacteria	norank	Proteobacteria	Gammaproteobacteria	Pasteurellales	Pasteurellaceae	Aggregatibacter	unclassified_Aggregatibacter	ASV27	0	0	0	0	0	0	0	0	1	0	0	0	0	0	0	0	0	0	0	0	0	0	0	0
Bacteria	norank	Firmicutes	Bacilli	Bacillales	Bacillaceae	Anoxybacillus	unclassified_Anoxybacillus	ASV26	0	0	0	0	0	0	0	0	0	0	0	0	0	0	0	0	0	0	0	0	0	0	2	0
Bacteria	norank	Firmicutes	Clostridia	Clostridia_UCG-014	norank_Clostridia_UCG-014	norank_norank_Clostridia_UCG-014	unclassified_norank_norank_Clostridia_UCG-014	ASV25	0	0	0	0	0	1	0	0	0	0	0	0	0	0	0	0	0	0	0	0	0	0	0	0
Bacteria	norank	Bacteroidota	Bacteroidia	Cytophagales	Hymenobacteraceae	Hymenobacter	Amia_calva_bowfin_Hymenobacter	ASV24	0	0	0	1	0	0	0	0	0	0	0	0	0	0	0	0	0	0	0	0	0	0	0	0
Bacteria	norank	Proteobacteria	Alphaproteobacteria	Rhizobiales	Beijerinckiaceae	Methylobacterium-Methylorubrum	unclassified_Methylobacterium-Methylorubrum	ASV23	0	0	0	0	0	0	0	0	0	0	0	0	0	3	0	0	0	0	0	0	0	0	0	0
Bacteria	norank	Proteobacteria	Gammaproteobacteria	Burkholderiales	Oxalobacteraceae	Candidatus_Profftella	Candidatus_Profftella_armatura	ASV22	0	0	0	0	39	32	0	0	0	0	0	0	0	46	0	0	0	0	0	35	0	0	0	0
Bacteria	norank	Firmicutes	Bacilli	Staphylococcales	Staphylococcaceae	Staphylococcus	unclassified_Staphylococcus	ASV21	0	3	0	0	0	0	0	0	0	0	0	157	0	9	0	0	0	0	0	0	0	0	0	0
Bacteria	norank	Proteobacteria	Alphaproteobacteria	Rickettsiales	Anaplasmataceae	Wolbachia	proteobacterium_symbiont_of_Nilaparvata_lugens_Wolbachia	ASV20	0	0	0	0	0	0	0	30	0	0	0	0	0	0	0	0	23	0	0	0	0	0	0	0
Bacteria	norank	Proteobacteria	Alphaproteobacteria	Rickettsiales	Anaplasmataceae	Wolbachia	proteobacterium_symbiont_of_Nilaparvata_lugens_Wolbachia	ASV2	8590	10927	9254	5415	5642	7553	6309	7724	7645	6542	5465	6284	10317	6449	6412	4484	5177	8466	7768	6601	7497	6310	7179	5769
Bacteria	norank	Proteobacteria	Alphaproteobacteria	Rickettsiales	Anaplasmataceae	Wolbachia	proteobacterium_symbiont_of_Nilaparvata_lugens_Wolbachia	ASV19	0	0	0	0	0	0	0	48	0	0	0	0	0	0	0	0	34	0	0	0	0	39	0	0
Bacteria	norank	Proteobacteria	Gammaproteobacteria	Burkholderiales	Oxalobacteraceae	Candidatus_Profftella	Candidatus_Profftella_armatura	ASV18	0	0	0	0	0	0	0	79	0	0	0	0	0	0	0	0	106	0	0	0	0	99	0	0
Bacteria	norank	Proteobacteria	Gammaproteobacteria	Burkholderiales	Oxalobacteraceae	Candidatus_Profftella	Candidatus_Profftella_armatura	ASV17	0	0	0	0	0	0	0	125	0	0	0	0	0	0	0	0	125	0	0	0	0	142	0	0
Bacteria	norank	Proteobacteria	Alphaproteobacteria	Rickettsiales	Anaplasmataceae	Wolbachia	proteobacterium_symbiont_of_Nilaparvata_lugens_Wolbachia	ASV16	0	0	0	0	0	0	0	0	27	0	0	0	0	0	0	0	0	0	25	0	34	0	45	0
Bacteria	norank	Proteobacteria	Alphaproteobacteria	Rickettsiales	Anaplasmataceae	Wolbachia	proteobacterium_symbiont_of_Nilaparvata_lugens_Wolbachia	ASV15	0	0	0	28	0	0	0	0	56	0	0	0	0	0	0	0	0	0	37	0	41	0	47	0
Bacteria	norank	Proteobacteria	Gammaproteobacteria	Burkholderiales	Oxalobacteraceae	Candidatus_Profftella	Candidatus_Profftella_armatura	ASV14	0	0	0	114	0	0	0	0	101	0	0	0	0	0	0	0	0	0	94	0	93	0	79	102
Bacteria	norank	Proteobacteria	Gammaproteobacteria	Burkholderiales	Oxalobacteraceae	Candidatus_Profftella	Candidatus_Profftella_armatura	ASV13	0	0	0	133	0	0	0	0	105	0	0	0	0	0	0	0	0	0	100	0	109	0	137	115
Bacteria	norank	Firmicutes	Bacilli	Bacillales	Bacillaceae	Anoxybacillus	unclassified_Anoxybacillus	ASV12	0	3	0	0	0	0	0	0	0	0	0	0	0	0	0	0	0	0	0	0	0	0	0	0
Bacteria	norank	Deinococcota	Deinococci	Thermales	Thermaceae	Meiothermus	unclassified_Meiothermus	ASV11	0	10	0	0	3	0	0	2	0	0	0	0	2	2	0	0	0	3	0	2	0	1	0	0
Bacteria	norank	Proteobacteria	Alphaproteobacteria	Rickettsiales	Anaplasmataceae	Wolbachia	proteobacterium_symbiont_of_Nilaparvata_lugens_Wolbachia	ASV10	0	0	0	0	0	0	0	0	0	0	0	23	0	0	22	0	0	0	0	0	0	0	0	0
Bacteria	norank	Proteobacteria	Gammaproteobacteria	Burkholderiales	Oxalobacteraceae	Candidatus_Profftella	Candidatus_Profftella_armatura	ASV1	23104	21023	22839	26047	26412	24265	25690	24057	24233	25619	26830	25571	21682	25779	25529	27870	26922	23607	23972	25295	24251	25349	24436	26416

## Sheet: Table S7
Table S7.The male adults under the high and low-temperature treatment the of Wolbachia and Profftella proportion analyses by Two-factor analyses.
Wolbachia
Difference	SS	df	MS	F	P-value	F crit
Male	0.004378	3	0.00145933	1.95403	0.298031	9.27663
High and Low temperature	0.0192668	1	0.0192668	25.798	0.0147428	10.128
error	0.0022405	3	0.000746835
total	0.0258854	7
Profftella
Difference	SS	df	MS	F	P-value	F crit
Male	0.00629955	3	0.00209985	5.58328	0.0957922	9.27663
High and Low temperature	0.0207061	1	0.0207061	121.924	0.00159097	10.128
error	0.000509485	3	0.000169828
total	0.0275152	7

## Sheet: Table S8
Table S8.The male and females under the high treatment of Wolbachia and Profftella proportion analyses by Two-factor analyses
Wolbachia
Difference	SS	df	MS	F	P-value	F crit
High temperature	0.00378857	3	0.00126286	2.62279	0.22468	9.27663
Male and female	0.00907878	1	0.00907878	18.8554	0.0225446	10.128
error	0.00144448	3	0.000481495
total	0.0143118	7
Profftella
Difference	SS	df	MS	F	P-value	F crit
High temperature	0.00497015	3	0.00165672	7.23306	0.069185	9.27663
Male and female	0.00826255	1	0.00826255	36.0735	0.00924615	10.128
error	0.000687144	3	0.000229048
total	0.0139198	7
